# Supplementary material
Source: publisher figshare collection journal article supplement (https://tandf.figshare.com/articles/dataset/_/5432746)
Supplement: Supplementary file 1 [file 1]

Table S1. Contents of 5 flavonoid constituents in wheat seeds during seed maturation

| Cultivar   | DAF | Dry weight<br>(mg/seed) | Compound (pmol/seed) |   |     |     |               |    |      |   |      |      |   |      |      |   |      |
|------------|-----|-------------------------|----------------------|---|-----|-----|---------------|----|------|---|------|------|---|------|------|---|------|
|            |     |                         | DHQ                  |   | DHM |     | (+) -catechin |    | PCB3 |   | PDB3 |      |   |      |      |   |      |
| Norin 61   | 5   | 2.8                     | 2                    | > |     | 2   | >             |    | 3    | ± | 1    | 0.2  | > |      | 0.2  | > |      |
|            | 7   | 4.1                     | 36                   | ± | 2   | 4   | ±             | 1  | 56   | ± | 2    | 0.2  | > |      | 0.2  | > |      |
|            | 10  | 7.1                     | 375                  | ± | 20  | 226 | ±             | 17 | 646  | ± | 24   | 5.2  | ± | 1.2  | 2.3  | ± | 0.7  |
|            | 12  | 9.5                     | 317                  | ± | 9   | 343 | ±             | 10 | 529  | ± | 65   | 44.3 | ± | 18.2 | 31.4 | ± | 14.1 |
|            | 15  | 14.8                    | 136                  | ± | 7   | 273 | ±             | 30 | 537  | ± | 119  | 23.4 | ± | 15.0 | 35.1 | ± | 20.1 |
|            | 20  | 22.4                    | 7                    | ± | 1   | 42  | ±             | 3  | 228  | ± | 10   | 1.1  | ± | 0.7  | 2.9  | ± | 2.0  |
|            | 25  | 34.0                    | 2                    | > |     | 6   | ±             | 1  | 97   | ± | 20   | 0.2  | > |      | 0.2  | > |      |
|            | 30  | 41.2                    | 2                    | > |     | 2   | >             |    | 30   | ± | 3    | 0.2  | > |      | 0.2  | > |      |
|            | 35  | 43.1                    | 2                    | > |     | 2   | >             |    | 15   | ± | 2    | 0.2  | > |      | 0.2  | > |      |
|            | 40  | 43.4                    | 2                    | > |     | 2   | >             |    | 5    | ± | 1    | 0.2  | > |      | 0.2  | > |      |
| Satonosora | 5   | 3.2                     | 2                    | > |     | 2   | >             |    | 5    | ± | 0    | 0.2  | > |      | 0.2  | > |      |
|            | 7   | 4.7                     | 69                   | ± | 9   | 6   | ±             | 3  | 116  | ± | 41   | 0.5  | ± | 0.2  | 0.2  | > |      |
|            | 10  | 7.2                     | 360                  | ± | 41  | 116 | ±             | 22 | 525  | ± | 122  | 15.2 | ± | 6.8  | 3.0  | ± | 0.9  |
|            | 12  | 9.1                     | 277                  | ± | 8   | 203 | ±             | 18 | 586  | ± | 83   | 18.2 | ± | 7.0  | 6.4  | ± | 2.4  |
|            | 15  | 13.0                    | 195                  | ± | 12  | 329 | ±             | 1  | 522  | ± | 36   | 10.2 | ± | 3.0  | 13.5 | ± | 3.3  |
|            | 20  | 22.9                    | 15                   | ± | 0   | 47  | ±             | 2  | 201  | ± | 7    | 1.6  | ± | 0.1  | 3.1  | ± | 0.2  |
|            | 25  | 31.8                    | 2                    | > |     | 4   | ±             | 0  | 112  | ± | 10   | 0.2  | > |      | 0.2  | > |      |
|            | 30  | 40.3                    | 2                    | > |     | 2   | >             |    | 33   | ± | 2    | 0.2  | > |      | 0.2  | > |      |
|            | 35  | 45.2                    | 2                    | > |     | 2   | >             |    | 12   | ± | 1    | 0.2  | > |      | 0.2  | > |      |
|            | 40  | 45.2                    | 2                    | > |     | 2   | >             |    | 4    | ± | 1    | 0.2  | > |      | 0.2  | > |      |
| Tamaizumi  | 5   | 3.2                     | 2                    | > |     | 2   | >             |    | 2    | > |      | 0.2  | > |      | 0.2  | > |      |
|            | 7   | 5.0                     | 2                    | > |     | 2   | >             |    | 2    | > |      | 0.2  | > |      | 0.2  | > |      |
|            | 10  | 7.5                     | 2                    | > |     | 2   | >             |    | 2    | > |      | 0.2  | > |      | 0.2  | > |      |
|            | 12  | 10.5                    | 2                    | > |     | 2   | >             |    | 2    | > |      | 0.2  | > |      | 0.2  | > |      |
|            | 15  | 14.1                    | 6                    | ± | 0   | 2   | >             |    | 3    | ± | 0    | 0.2  | > |      | 0.2  | > |      |
|            | 20  | 26.6                    | 2                    | > |     | 2   | >             |    | 2    | > |      | 0.2  | > |      | 0.2  | > |      |
|            | 25  | 37.1                    | 2                    | > |     | 2   | >             |    | 2    | > |      | 0.2  | > |      | 0.2  | > |      |
|            | 30  | 47.4                    | 3                    | ± | 0   | 2   | >             |    | 2    | > |      | 0.2  | > |      | 0.2  | > |      |
|            | 35  | 50.7                    | 2                    | > |     | 2   | >             |    | 2    | > |      | 0.2  | > |      | 0.2  | > |      |
|            | 40  | 51.0                    | 2                    | > |     | 2   | >             |    | 2    | > |      | 0.2  | > |      | 0.2  | > |      |

Contents are expressed as mean ± standard deviation (n = 3)
