# Supplementary material
Source: publisher figshare collection journal article supplement (https://tandf.figshare.com/articles/dataset/_/5432746)
Supplement: Supplementary file 2 [file 1]

Table S2. Contents of 5 flavonoid constituents in barley seeds during seed maturation

| Cultivar   | DAF | Dry weight<br>(mg/seed) | Compound (nmol/seed) |   |     |     |               |     |      |   |      |      |   |      |       |   |      |
|------------|-----|-------------------------|----------------------|---|-----|-----|---------------|-----|------|---|------|------|---|------|-------|---|------|
|            |     |                         | DHQ                  |   | DHM |     | (+) -catechin |     | PCB3 |   | PDB3 |      |   |      |       |   |      |
| Fiber Snow | 5   | 5.6                     | 0.1                  | > |     | 0.1 | >             |     | 0.1  | > |      | 0.01 | > |      | 0.01  | > |      |
|            | 7   | 7.6                     | 0.1                  | > |     | 0.1 | >             |     | 0.1  | > |      | 0.01 | > |      | 0.01  | > |      |
|            | 10  | 10.4                    | 0.4                  | ± | 0.0 | 0.1 | ±             | 0.0 | 11.2 | ± | 1.8  | 1.23 | ± | 0.29 | 0.41  | ± | 0.05 |
|            | 12  | 13.0                    | 0.2                  | ± | 0.0 | 0.3 | ±             | 0.0 | 21.2 | ± | 1.2  | 2.30 | ± | 0.10 | 1.88  | ± | 0.09 |
|            | 15  | 20.3                    | 0.2                  | ± | 0.0 | 0.8 | ±             | 0.1 | 37.5 | ± | 1.9  | 3.73 | ± | 0.75 | 8.07  | ± | 0.62 |
|            | 20  | 30.0                    | 0.1                  | > |     | 0.6 | ±             | 0.0 | 26.8 | ± | 1.4  | 4.73 | ± | 0.36 | 17.09 | ± | 0.99 |
|            | 25  | 35.5                    | 0.1                  | > |     | 0.1 | >             |     | 12.4 | ± | 1.8  | 3.60 | ± | 0.81 | 14.69 | ± | 3.21 |
|            | 30  | 41.8                    | 0.1                  | > |     | 0.1 | >             |     | 5.1  | ± | 0.3  | 5.10 | ± | 0.55 | 18.26 | ± | 1.67 |
|            | 35  | 39.3                    | 0.1                  | > |     | 0.1 | >             |     | 2.5  | ± | 0.1  | 4.71 | ± | 1.01 | 19.49 | ± | 0.75 |
|            | 40  | 39.2                    | 0.1                  | > |     | 0.1 | >             |     | 2.4  | ± | 0.2  | 5.69 | ± | 0.10 | 16.04 | ± | 0.42 |

Contents are expressed as mean ± standard deviation (n = 3)
