# Supplementary material
Source: publisher figshare collection journal article supplement (https://tandf.figshare.com/articles/dataset/_/5432746)
Supplement: Supplementary file 3 [file 1]

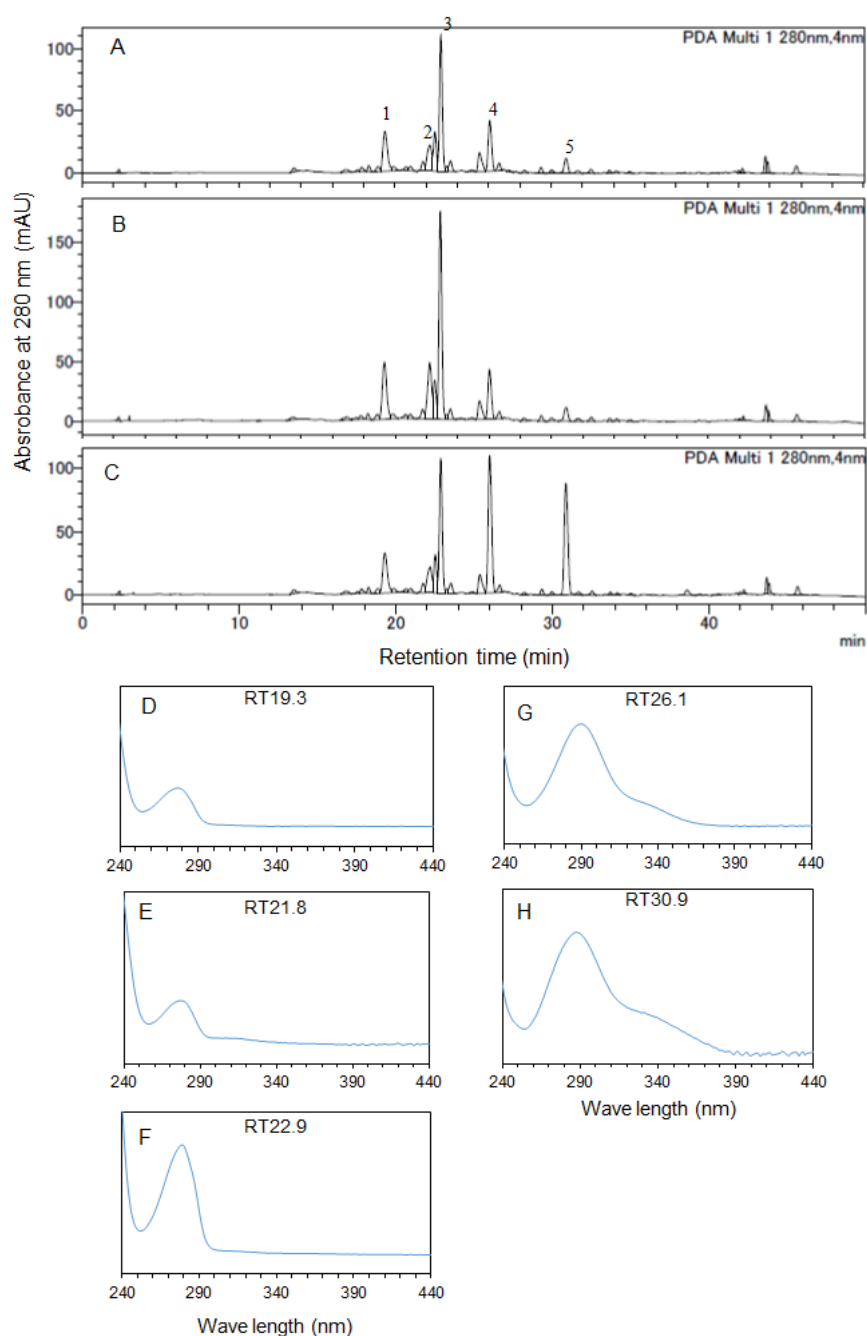

Fig. S1. Chromatogram of the MeOH<sub>2</sub> fraction from the seed coat of "Norin 61" at 10 DAF.

Notes: (A) MeOH<sub>2</sub> fraction only (B) A mixture of authentic samples of PDB3, PCB3, and (+)-catechin was co-eluted with the MeOH<sub>2</sub> fraction. (C) A mixture of authentic samples of DHM and DHQ was co-eluted with the MeOH<sub>2</sub> fraction. Peaks 1–5 were consistent with authentic samples of PDB3, PCB3, (+)-catechin, DHM, and DHQ, respectively. (D–H) showed the absorption spectra of peaks 1, 2, 3, 4, and 5, respectively.
