# Supplementary material
Source: publisher figshare collection journal article supplement (https://tandf.figshare.com/articles/dataset/_/5432746)
Supplement: Supplementary file 4 [file 1]

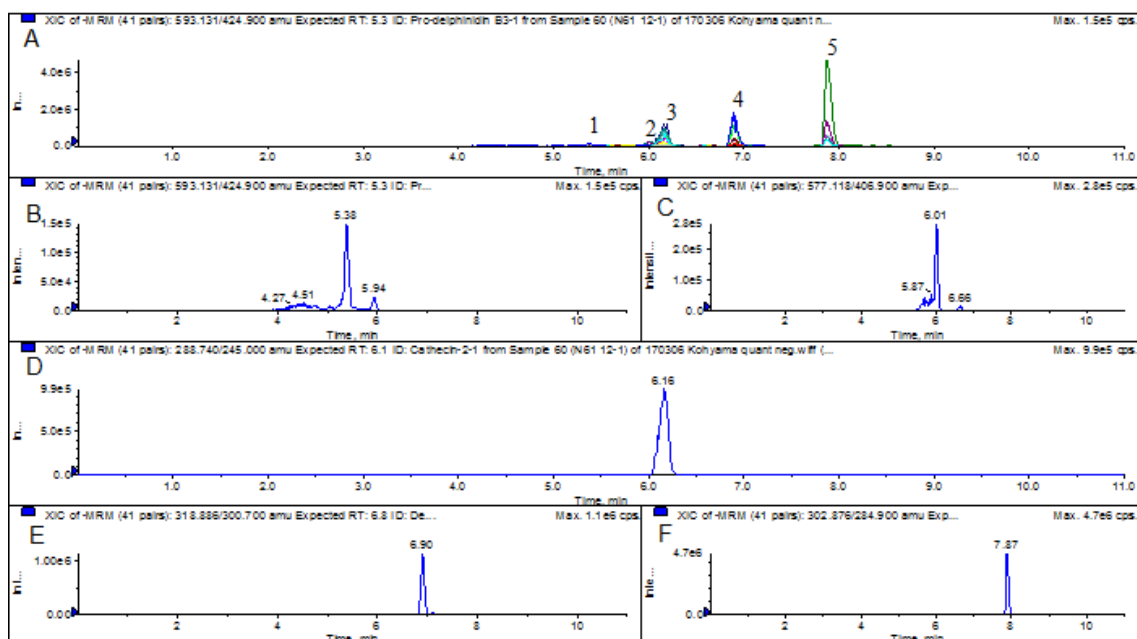

Fig. S2. Chromatogram of the seed extract of "Norin 61" at 12 DAF by LC-MS/MS analysis in MRM mode.

Chromatograms of total ions (A), transition of  $m/z$  593.1/424.9 (B), 577.1/424.9 (C), 288.8/245.0 (D), 318.9/300.7 (E), and 302.9/284.9 (F), respectively. Peaks 1–5 were consistent with authentic samples of PDB3, PCB3, (+)-catechin, DHM, and DHQ, respectively.
