# Supplementary material
Source: publisher figshare collection journal article supplement (https://tandf.figshare.com/articles/dataset/_/5432746)
Supplement: Supplementary file 5 [file 1]

Archive with 4 entries (4 files):
- tbbb_a_1373589_sm5741.pdf
- tbbb_a_1373589_sm5738.pdf
- tbbb_a_1373589_sm5737.pdf
- tbbb_a_1373589_sm5735.pdf
